# Supplementary material for: A comparison of non-surgical methods for sexing young gopher tortoises ( Gopherus polyphemus )
Source: PeerJ journal article supplement (doi:10.7717/peerj.13599), 2022-06-14

# Saline injections

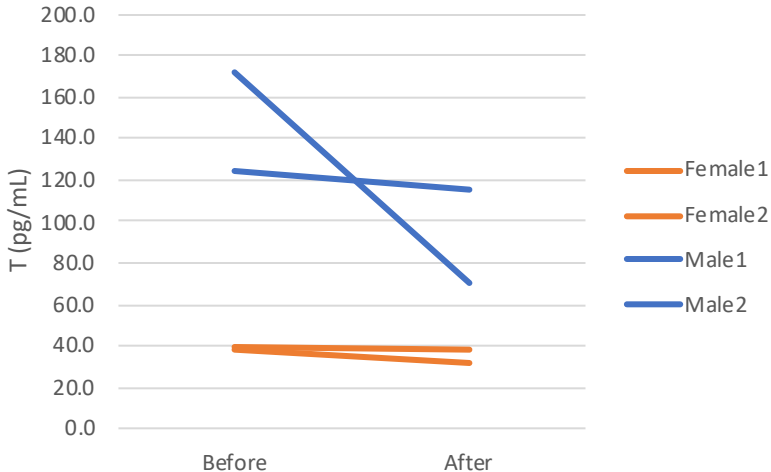

Supplement: FigureS3rev.pdf [file FigureS3rev.pdf]
